# Supplementary material
Source: PubMed Central journal article supplement (PMC5863077)
Supplement: Supp_Table1.pdf [file Supp_Table1.pdf]

## Supplementary Data

SUPPLEMENTARY TABLE S1. PREDICTORS OF COMING TO VOLUME BY DAY 14 (UNWEIGHTED MODEL)

| <i>Characteristic, n=205</i>                               | <i>OR (95% CI)</i> | <i>p</i> |
|------------------------------------------------------------|--------------------|----------|
| <b>Sociodemographic factors</b>                            |                    |          |
| Maternal age (years)                                       | 0.97 (0.90–1.04)   | 0.39     |
| Low socioeconomic status                                   | 1.19 (0.47–2.98)   | 0.71     |
| Married                                                    | 3.37 (1.21–9.35)   | 0.02*    |
| Race/ethnicity (white is reference)                        |                    | <0.01*   |
| Hispanic                                                   | 1.22 (0.43–3.44)   | 0.71     |
| Black                                                      | 6.59 (2.06–21.07)  | <0.01*   |
| Highest education (<High school is reference)              |                    | 0.18     |
| High school                                                | 2.26 (0.65–7.82)   | 0.20     |
| Trade or <BA/BS                                            | 0.94 (0.26–3.44)   | 0.93     |
| BA/BS or higher                                            | 0.65 (0.15–2.83)   | 0.57     |
| Previous breastfeeding experience (yes is reference)       |                    | 0.05*    |
| No (primiparous)                                           | 0.76 (0.32–1.78)   | 0.53     |
| No (multiparous)                                           | 0.21 (0.06–0.74)   | 0.02*    |
| <b>Prepregnancy health factors</b>                         |                    |          |
| Prepregnancy overweight/obese (BMI ≥25)                    | 0.50 (0.23–1.09)   | 0.08     |
| Hypertension                                               | 0.55 (0.14–2.18)   | 0.39     |
| <b>Pregnancy complications</b>                             |                    |          |
| Multiple gestation                                         | 1.52 (0.49–4.75)   | 0.47     |
| Pre-eclampsia/eclampsia                                    | 0.54 (0.13–2.21)   | 0.39     |
| Premature rupture of membranes                             | 1.85 (0.48–7.11)   | 0.37     |
| Placental abruption                                        | 2.68 (0.58–12.38)  | 0.21     |
| Fetal heart rate abnormalities or poor biophysical profile | 1.92 (0.56–6.53)   | 0.30     |
| Intrauterine growth restriction                            | 0.45 (0.07–3.00)   | 0.41     |
| Uterine abnormalities/cerclage                             | 1.56 (0.39–6.27)   | 0.53     |
| Chorioamnionitis                                           | 0.18 (0.04–0.74)   | 0.02*    |
| Preterm labor                                              | 0.54 (0.12–2.33)   | 0.41     |
| <b>Labor and delivery factors</b>                          |                    |          |
| Induction of labor                                         | 1.50 (0.37–6.04)   | 0.57     |
| Cesarean delivery                                          | 0.32 (0.13–0.79)   | 0.01*    |
| Gestational age (weeks)                                    | 1.38 (1.16–1.64)   | <0.01*   |

\* $p < 0.05$ .

BA/BS, bachelor of arts/bachelor of science; BMI, body mass index; CI, confidence interval; OR, odds ratio.
