# Supplementary material
Source: PubMed Central journal article supplement (PMC5863077)
Supplement: Supp_Table2.pdf [file Supp_Table2.pdf]

SUPPLEMENTARY TABLE S2. PREDICTORS OF INFANT  
RECEIVING MOTHER'S OWN MILK FEEDINGS  
AT NEONATAL INTENSIVE CARE UNIT DISCHARGE  
(UNWEIGHTED MODEL)

| <i>Characteristic, n=205</i>                                     | <i>OR (95% CI)</i> | <i>p</i> |
|------------------------------------------------------------------|--------------------|----------|
| <b>Sociodemographic factors</b>                                  |                    |          |
| Maternal age (years)                                             | 1.07 (1.00–1.15)   | 0.06     |
| Low socioeconomic status                                         | 0.56 (0.22–1.45)   | 0.23     |
| Married                                                          | 1.62 (0.64–4.07)   | 0.31     |
| Race/ethnicity<br>(white is reference)                           |                    | 0.90     |
| Hispanic                                                         | 1.03 (0.35–3.02)   | 0.96     |
| black                                                            | 0.81 (0.25–2.64)   | 0.73     |
| Highest education (<high<br>school is reference)                 |                    | 0.16     |
| High school                                                      | 0.24 (0.07–0.87)   | 0.03     |
| Trade or <BA/BS                                                  | 0.40 (0.11–1.43)   | 0.16     |
| BA/BS or higher                                                  | 0.54 (0.13–2.30)   | 0.40     |
| Previous breastfeeding<br>experience (yes<br>is reference)       |                    | 0.12     |
| No (primiparous)                                                 | 2.47 (1.00–6.12)   | 0.05     |
| No (multiparous)                                                 | 1.12 (0.33–3.83)   | 0.86     |
| <b>Prepregnancy health factors</b>                               |                    |          |
| Prepregnancy overweight/<br>obese<br>(BMI ≥25)                   | 1.62 (0.71–3.68)   | 0.25     |
| Hypertension                                                     | 0.61 (0.16–2.24)   | 0.45     |
| <b>Pregnancy complications</b>                                   |                    |          |
| Multiple gestation                                               | 0.44 (0.13–1.48)   | 0.18     |
| Pre-eclampsia/eclampsia                                          | 0.50 (0.11–2.15)   | 0.35     |
| Premature rupture<br>of membranes                                | 1.40 (0.35–5.63)   | 0.63     |
| Placental abruption                                              | 0.48 (0.10–2.19)   | 0.34     |
| Fetal heart rate<br>abnormalities or poor<br>biophysical profile | 2.37 (0.65–8.66)   | 0.19     |
| Intrauterine growth<br>restriction                               | 0.52 (0.07–3.77)   | 0.52     |
| Uterine abnormalities/<br>cerclage                               | 0.99 (0.25–3.93)   | 0.99     |
| Chorioamnionitis                                                 | 0.59 (0.18–1.96)   | 0.39     |
| Preterm labor                                                    | 0.87 (0.20–3.82)   | 0.85     |
| <b>Labor and delivery factors</b>                                |                    |          |
| Induction of labor                                               | 0.97 (0.26–3.55)   | 0.96     |
| Cesarean delivery                                                | 0.85 (0.36–2.02)   | 0.72     |
| Gestational age (weeks)                                          | 1.14 (0.96–1.35)   | 0.15     |
| <b>MOM</b>                                                       |                    |          |
| CTV by day 14                                                    | 8.76 (3.64–21.09)  | <0.01*   |

\* $p < 0.05$ .

BA/BS, bachelor of arts/bachelor of science; BMI, body mass index; CI, confidence interval; CTV, coming to volume; MOM, mother's own milk; OR, odds ratio.
